# Supplementary material for: Sb2O3 nanoparticles anchored on N-doped graphene nanoribbons as improved anode for sodium-ion batteries
Source: Royal Society of Chemistry journal article supplement (doi:10.1039/d1ra04618g), 2021-01-01
Supplement: d1ra04618g1.pdf [file d1ra04618g1.pdf]

## Supporting information

# **Sb<sub>2</sub>O<sub>3</sub> nanoparticles anchored in N-doped graphene nanoribbons anode for sodium-ion batteries**

Oscar Andrés Jaramillo-Quintero<sup>a,b,\*</sup>, Royer Valentín Barrera-Peralta<sup>a</sup>, Agustín Barón Jaimes<sup>a,c</sup>, Ramses Alejandro Miranda-Gamboa<sup>a</sup>, and Marina Elizabeth Rincon<sup>a</sup>

<sup>a</sup> *Instituto de Energías Renovables, Universidad Nacional Autónoma de México, Privada Xochicalco S/N, C.P. 62580 Temixco, Mor., México.*

<sup>b</sup> *Catedrático CONACYT-Instituto de Energías Renovables, Universidad Nacional Autónoma de México, Privada Xochicalco S/N, C.P. 62580 Temixco, Mor., México.*

<sup>c</sup> *Departamento de Ciencias Básicas, Unidades Tecnológicas de Santander, Av. Los Estudiantes #9-82, C.P. 680005318 Bucaramanga, Santander, Colombia.*

\* *E-mail address:* oajaq@ier.unam.mx

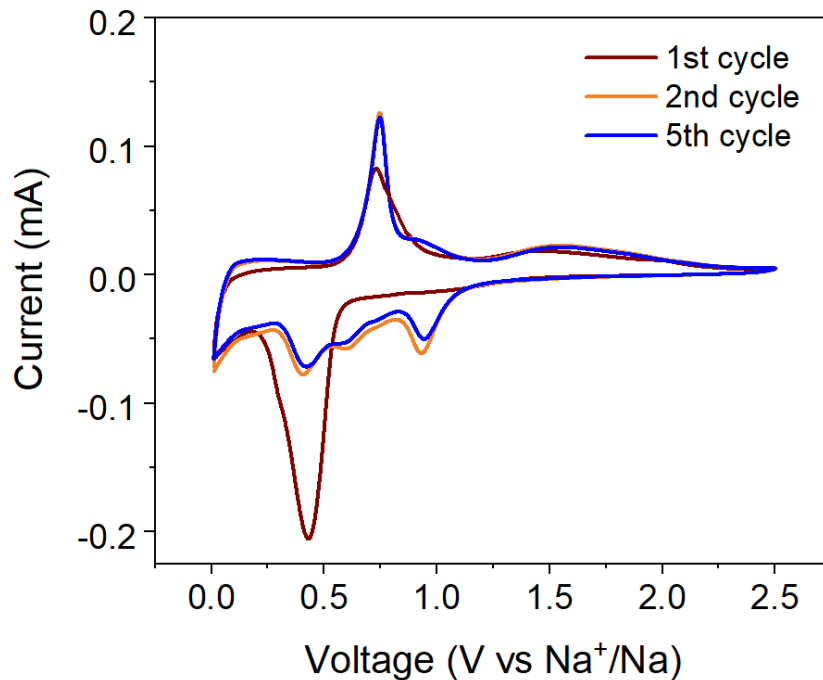

**Figure S1.** Cyclic voltammograms of 1st, 2nd and 5 cycles at a scan rate of  $0.1 \text{ mV s}^{-1}$  for control anode.

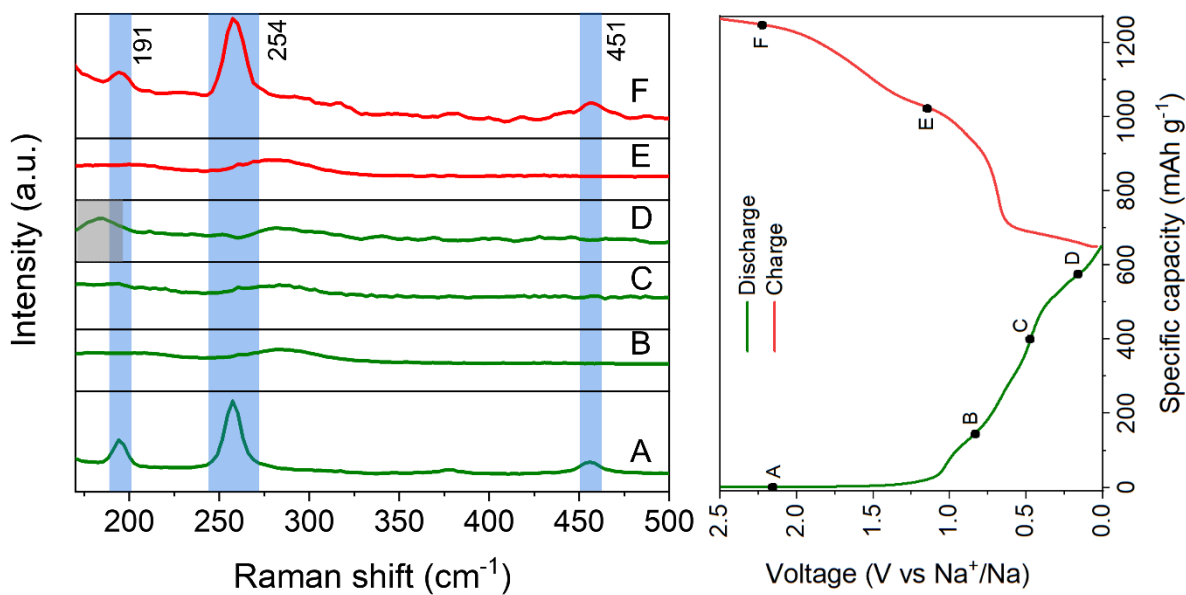

**Figure S2.** *Ex situ* Raman spectra of  $\text{Sb}_2\text{O}_3/\text{GNR}$  electrodes during sodiation/desodiation processes at selected potentials, including the discharge/charge profiles at  $10 \text{ mA g}^{-1}$  between 0 and 2.5 V. (A: discharged to 2.2 V, B: discharged to 0.8 V, C: discharged to 0.5 V, D: discharged to 0.2 V, E: charged to 1.2 V, and F: charged to 2.2 V).

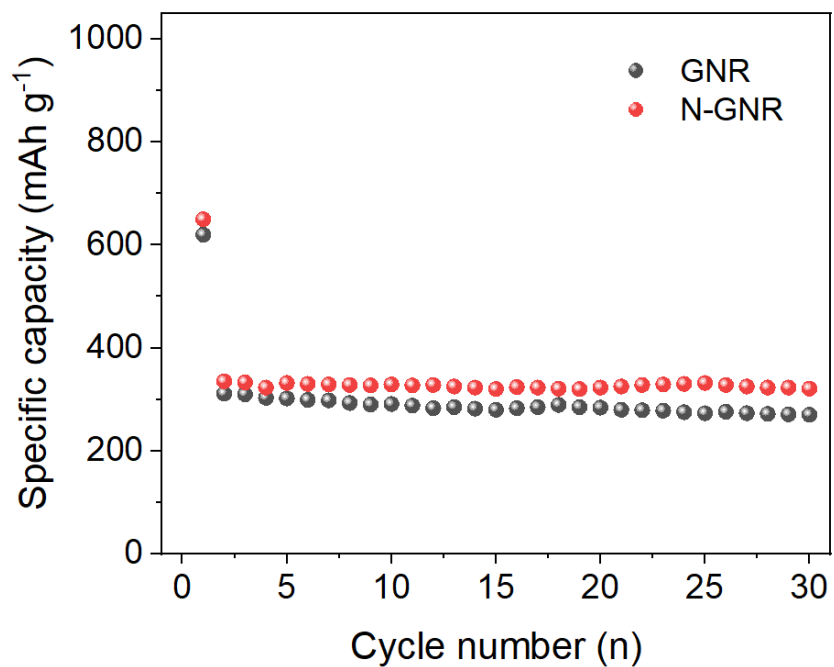

**Figure S3.** Cycling performance of GNR and N-GNR after 30 cycles at a current density of 0.1 A g<sup>-1</sup>.

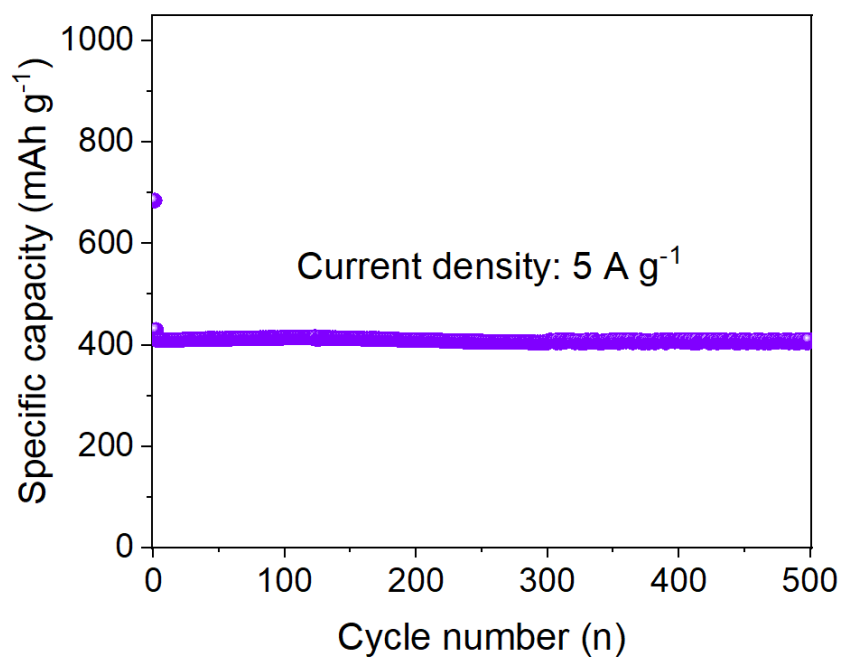

**Figure S4.** Long-term cycling stability of Sb<sub>2</sub>O<sub>3</sub>/N-GNR anode at a current density of 5 A g<sup>-1</sup>.

**Table S1.** Comparison of the Na storage performance of  $\text{Sb}_2\text{O}_3/\text{N-GNR}$  with previously reported composites based on  $\text{Sb}_2\text{O}_3$  and nitrogen-doped carbon nanostructures.

| Anode                                            | Current density ( $\text{A g}^{-1}$ ) | Specific capacity ( $\text{mAhg}^{-1}$ ) | Reference |
|--------------------------------------------------|---------------------------------------|------------------------------------------|-----------|
| $\text{Sb}/\text{Sb}_2\text{O}_3@\text{NCNFs}$   | 0.1                                   | 527.3 after 100 cycles                   | 1         |
| $\text{Sb}@\text{Sb}_2\text{O}_3@\text{N-3DCHs}$ | 0.1                                   | 507.9 after 100 cycles                   | 2         |
| $\text{SbO}_2/\text{Sb}_2\text{O}_3@\text{NC}$   | 0.1                                   | 622 after 100 cycles                     | 3         |
| $\text{Sb}_2\text{O}_3/\text{N-GNR}$             | 0.1                                   | 658 after 100 cycles                     | This work |

**Before cycling**

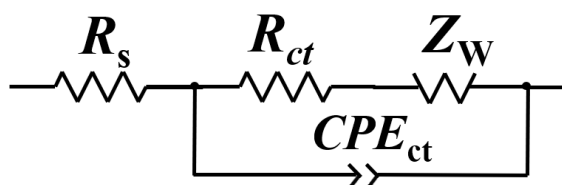

**After cycling**

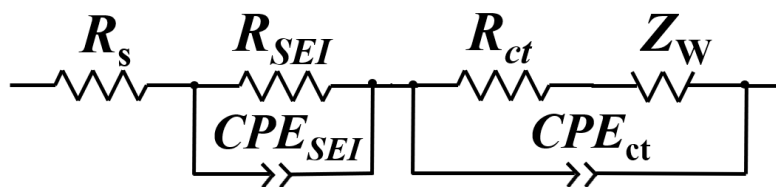

**Figure S5.** Equivalent circuits of Nyquist plots analysis for  $\text{Sb}_2\text{O}_3/\text{N-GNR}$  and control anodes before and after 100 cycles.

## References

- 1 D. Li, Junzhi Li, J. Cao, X. Fu, L. Zhou and W. Han, *Sustain. Energy Fuels*, 2020, **4**, 5732-5738.
- 2 B. Chen, L. Yang, X. Bai, Q. Wu, M. Liang, Y. Wang, N. Zhao, C. Shi, B. Zhou and C. He, *Small*, 2021, **17**, 2006824.
- 3 Z. Han, J. Zheng, F. Kong, S. Tao and B. Qian, *Nano Select* 2021, **2**, 425-432.
- 4 Y. Geng, T. Fujita, R. Bleischwitz, A. Chiu and J. Sarkis, *J. Clean. Prod.*, 2019, **213**, 118020.
